# Supplementary material
Source: PubMed Central journal article supplement (PMC3671498)
Supplement: NIHMS451825-supplement-1_si_001.pdf [file NIHMS451825-supplement-1_si_001.pdf]

# A critical evaluation of random copolymer mimesis of homogeneous antimicrobial peptides

*Kan Hu ‡ †, Nathan W. Schmidt ‡ §, Rui Zhu †, Yunjiang Jiang †, Ghee Hwee Lai §, Gang Wei ¶, Edmund F. Palermo □, Kenichi Kuroda \* □ #, Gerard C. L. Wong \* §, Lihua Yang \* † ¶*

† CAS Key Laboratory of Soft Matter Chemistry, CAS Key Laboratory of Materials for Energy Conversion, Department of Materials Science and Engineering, University of Science and Technology of China, Hefei, Anhui 230026 China

§ Department of Bioengineering, University of California at Los Angeles, Los Angeles, CA 90095 United States

¶ School of Chemical Engineering, Sichuan University, Chengdu, Sichuan 610064 China

□ Macromolecular Science and Engineering Center, University of Michigan at Ann Arbor, Ann Arbor, MI 48109 United States

# Department of Biologic and Materials Science, School of Dentistry, University of Michigan at Ann Arbor, Ann Arbor, MI 48109 United States

‡ These authors contributed equally.

1. Figure S1. GPC elution characterization of the as-prepared MA-co-AEMA copolymers after de-protection. The GPC spectra (acetic acid/acetate buffer + 20% acetonitrile, calibrated with polystyrene standard) were obtained from a Waters 515 Pump and Waters 2410 Refractive Index Detector.

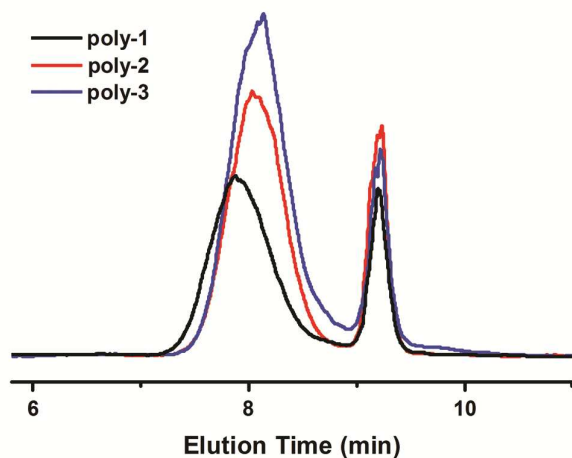

2. Table S1. Average molecular weights and polydispersities of the polymer SMAMPs according to GPC analysis.

| copolymer | Mn (GPC) | Mw/Mn (PDI) |
|-----------|----------|-------------|
| poly-1    | 2930     | 1.79        |
| poly-2    | 2380     | 1.52        |
| poly-3    | 2040     | 1.63        |

3. Figure S2. The Log P versus polymer side chain length, L, for the methacrylate monomers from published octanol-H<sub>2</sub>O partition coefficient measurements.

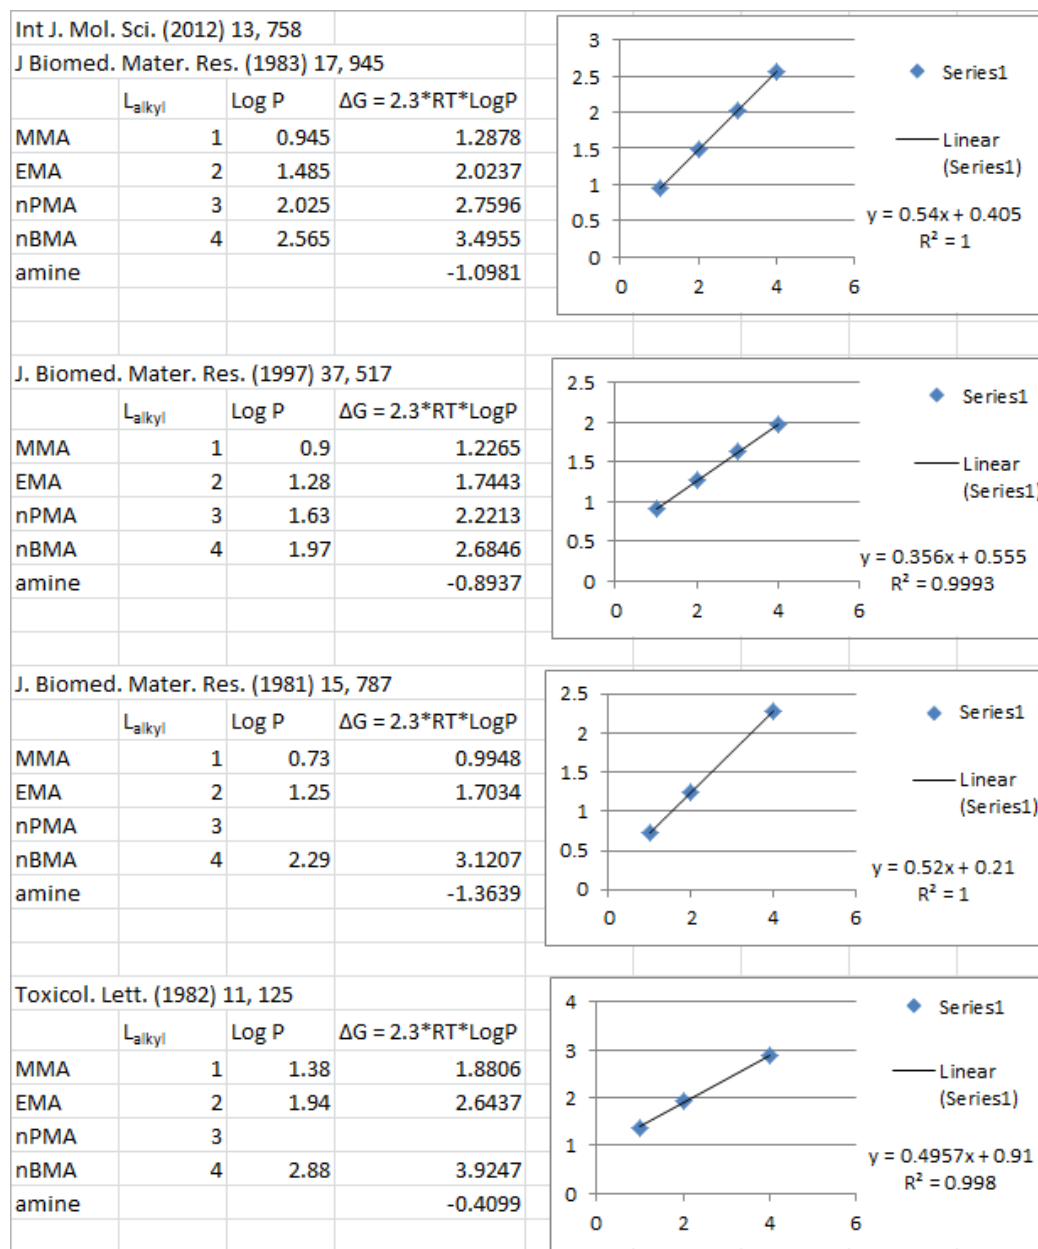

4. Figure S3. Comparison on <Hydrophobicity> of SMAMPs and AMPs using methacrylate hydrophobicity scales from different references<sup>1-4</sup>. The differences we observe between the random methacrylate copolymer SMAMPs and natural AMPs are robust, and do not depend on details of the scale used.

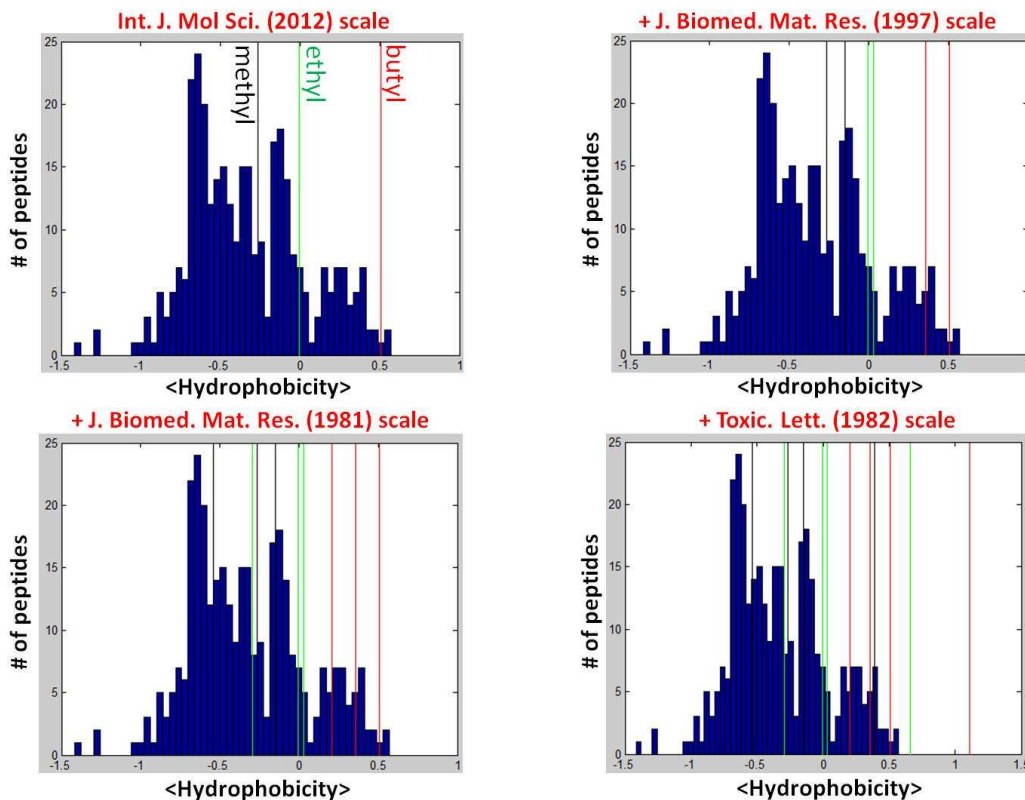

#### References

1. Fujisawa, S.; Kadoma, Y. *International Journal of Molecular Sciences* **2012**, *13*, (1), 758-773.
2. Yoshii, E. *Journal of Biomedical Materials Research* **1997**, *37*, (4), 517-524.
3. Fujisawa, S.; Masuhara, E. *Journal of Biomedical Materials Research* **1981**, *15*, (6), 787-793.
4. Hideji, T.; Kazuo, H. *Toxicology Letters* **1982**, *11*, (1-2), 125-129.
